# Supplementary material for: Genomic Environment Predicts Expression Patterns on the Human Inactive X Chromosome
Source: PubMed Central journal article supplement (PMC1584270; doi:10.1371/journal.pgen.0020151), 2006-09-29
Supplement: pgen.0020151.st001.pdf [file pgen.0020151.st001.pdf]

### Supplemental Table 1. Composition of Xp22 subgenomes

Percentage of sequence in repeats.

|                       |             | <b>I 50K</b> | <b>E 50K</b> | <b>I 100K</b> | <b>E 100K</b> | <b>I 250K</b> | <b>E 250K</b> |
|-----------------------|-------------|--------------|--------------|---------------|---------------|---------------|---------------|
| <b>GC</b>             |             | 40.6         | 41.17        | 40.58         | 40.85         | 39.39         | 40.1          |
| <b>SINEs</b>          |             | 15.85        | 15.79        | 12.19         | 13.14         | 10.49         | 10.8          |
|                       | ALUs        | 13.25        | 14.04        | 9.44          | 11.44         | 7.62          | 9.4           |
|                       | MIRs        | 2.6          | 1.74         | 2.75          | 1.69          | 2.87          | 1.43          |
| <b>LINEs</b>          |             | 16.59        | 11.97        | 19.08         | 12.02         | 19.63         | 13.8          |
|                       | LINE1       | 13.31        | 9.72         | 15.38         | 9.41          | 15.79         | 11.1          |
|                       | LINE2       | 2.86         | 1.71         | 3.15          | 1.86          | 3.39          | 2.02          |
|                       | L3/CR1      | 0.3          | 0.47         | 0.36          | 0.66          | 0.32          | 0.54          |
| <b>LTR</b>            |             | 6.61         | 9.27         | 7.08          | 10.43         | 6.01          | 12.5          |
|                       | MaLRs       | 3.88         | 4.25         | 4.04          | 4.21          | 4.04          | 5.62          |
|                       | ERVL        | 1.31         | 1.17         | 1.48          | 1.6           | 1.14          | 1.48          |
|                       | ERV_classI  | 1.33         | 3.74         | 1.34          | 4.42          | 0.57          | 5.27          |
|                       | ERV_classII | 0.1          | 0.1          | 0.2           | 0.2           | 0.22          | 0.11          |
| <b>DNA</b>            |             | 4.39         | 3.93         | 4.61          | 3.76          | 4.97          | 3.58          |
|                       | MER1_type   | 2.8          | 2.67         | 3.18          | 2.44          | 3.51          | 2.32          |
|                       | MER2_type   | 0.97         | 0.78         | 0.8           | 0.9           | 0.75          | 0.9           |
| <b>Simple repeats</b> |             | 0.61         | 0.88         | 0.71          | 1.03          | 0.72          | 1.29          |
| <b>Low complexity</b> |             | 0.48         | 0.54         | 0.44          | 0.71          | 0.47          | 0.72          |

|              | <b>Gene</b> | <b>Expression</b> | <b>TSS</b> | <b>Start of Coordinate</b> | <b>End of Coordinate</b> | <b>Contig number</b> |
|--------------|-------------|-------------------|------------|----------------------------|--------------------------|----------------------|
| <b>I 50K</b> | Hs.187608   | 1 / 9             | 10397719   | 10347719                   | 10447719                 | 1                    |
|              | MID1        | 1 / 9             | 10398195   | 10348195                   | 10448195                 | 1                    |
|              | HCCS        | 0 / 9             | 10889118   | 10839118                   | 10939118                 | 2                    |
|              | H48827      | 1 / 9             | 11030019   | 10980019                   | 11080019                 | 3                    |
|              | ARHGAP6     | 1 / 9             | 11443478   | 11393478                   | 11493478                 | 4                    |

|            |       |          |          |          |    |
|------------|-------|----------|----------|----------|----|
| PRPS2      | 0 / 5 | 12569187 | 12519187 | 12619187 | 5  |
| GLRA2      | 1 / 9 | 14307306 | 14257306 | 14357306 | 6  |
| FANCB      | 0 / 9 | 14650848 | 14600848 | 14700848 | 7  |
| MOSPD2     | 0 / 9 | 14651219 | 14601219 | 14701219 | 7  |
| RAI2       | 0 / 9 | 17638484 | 17588484 | 17688484 | 8  |
| Hs.220888  | 0 / 9 | 18124098 | 18074098 | 18174098 | 9  |
| SCML2      | 0 / 9 | 18132458 | 18082458 | 18182458 | 9  |
| Hs.149297  | 0 / 9 | 18863600 | 18813600 | 18913600 | 10 |
| DKFZp686CC | 0 / 9 | 18867606 | 18817606 | 18917606 | 10 |
| PDHA1      | 0 / 6 | 19121707 | 19071707 | 19171707 | 11 |
| CXorf23    | 1 / 9 | 19744081 | 19694081 | 19794081 | 12 |
| RPS6KA3    | 0 / 9 | 20044407 | 19994407 | 20094407 | 13 |
| YY2        | 0 / 9 | 21634259 | 21584259 | 21684259 | 14 |
| SMS        | 0 / 6 | 21718524 | 21668524 | 21768524 | 14 |
| FLJ37866   | 0 / 9 | 21950757 | 21900757 | 22000757 | 15 |
| AA601738   | 1 / 9 | 23677260 | 23627260 | 23727260 | 16 |
| PDK3       | 0 / 9 | 24243071 | 24193071 | 24293071 | 17 |
| Hs.403937  | 0 / 9 | 24318005 | 24268005 | 24368005 | 17 |
| POLA       | 0 / 9 | 24471720 | 24421720 | 24521720 | 18 |
| Z39260     | 0 / 9 | 24583884 | 24533884 | 24633884 | 19 |

**E 50K**

|           |       |          |          |          |   |
|-----------|-------|----------|----------|----------|---|
| NLGN4X    | 9 / 9 | 6005624  | 5955624  | 6055624  | 1 |
| FLJ12417  | 9 / 9 | 6842305  | 6792305  | 6892305  | 2 |
| HDHD1A    | 8 / 9 | 6925883  | 6875883  | 6975883  | 2 |
| STS       | 9 / 9 | 6997232  | 6947232  | 7047232  | 2 |
| Hs.186498 | 9 / 9 | 7123776  | 7073776  | 7173776  | 3 |
| N74477    | 8 / 9 | 7188013  | 7138013  | 7238013  | 3 |
| Hs.495638 | 9 / 9 | 7234805  | 7184805  | 7284805  | 3 |
| PNPLA4    | 9 / 9 | 7705179  | 7655179  | 7755179  | 4 |
| Hs.495641 | 9 / 9 | 8234774  | 8184774  | 8284774  | 5 |
| MGC17403  | 9 / 9 | 13430899 | 13380899 | 13480899 | 6 |
| RAB9A     | 9 / 9 | 13466997 | 13416997 | 13516997 | 6 |
| SEDL      | 9 / 9 | 13512374 | 13462374 | 13562374 | 6 |
| OFD1      | 6 / 6 | 13512536 | 13462536 | 13562536 | 6 |

|           |       |          |          |          |    |
|-----------|-------|----------|----------|----------|----|
| Hs.41434  | 9 / 9 | 13556895 | 13506895 | 13606895 | 6  |
| GPM6B     | 8 / 9 | 13716488 | 13666488 | 13766488 | 7  |
| AA952971  | 9 / 9 | 13772392 | 13722392 | 13822392 | 7  |
| FAM51A1   | 9 / 9 | 13807668 | 13757668 | 13857668 | 7  |
| PIR       | 9 / 9 | 15271016 | 15221016 | 15321016 | 8  |
| TMEM27    | 9 / 9 | 15442811 | 15392811 | 15492811 | 9  |
| CA5BL     | 9 / 9 | 15480672 | 15430672 | 15530672 | 9  |
| CA5B      | 9 / 9 | 15516081 | 15466081 | 15566081 | 9  |
| Hs.121592 | 9 / 9 | 15614002 | 15564002 | 15664002 | 9  |
| Hs.431654 | 9 / 9 | 15628315 | 15578315 | 15678315 | 9  |
| AP1S2     | 9 / 9 | 15632757 | 15582757 | 15682757 | 9  |
| Hs.431102 | 9 / 9 | 16370147 | 16320147 | 16420147 | 10 |
| CALB3     | 9 / 9 | 16427937 | 16377937 | 16477937 | 10 |
| CTPS2     | 9 / 9 | 16490700 | 16440700 | 16540700 | 10 |
| SYAP1     | 9 / 9 | 16497411 | 16447411 | 16547411 | 10 |
| CXORF15   | 9 / 9 | 16564216 | 16514216 | 16614216 | 10 |
| RBBP7     | 9 / 9 | 16648094 | 16598094 | 16698094 | 10 |
| ZFX       | 9 / 9 | 23929464 | 23879464 | 23979464 | 11 |

**I 100K**

|            |       |          |          |          |   |
|------------|-------|----------|----------|----------|---|
| Hs.187608  | 1 / 9 | 10397719 | 10297719 | 10497719 | 1 |
| MID1       | 1 / 9 | 10398195 | 10298195 | 10498195 | 1 |
| HCCS       | 0 / 9 | 10889118 | 10789118 | 10989118 | 2 |
| H48827     | 1 / 9 | 11030019 | 10930019 | 11130019 | 2 |
| GLRA2      | 1 / 9 | 14307306 | 14207306 | 14407306 | 3 |
| FANCB      | 0 / 9 | 14650848 | 14550848 | 14750848 | 4 |
| MOSPD2     | 0 / 9 | 14651219 | 14551219 | 14751219 | 4 |
| RAI2       | 0 / 9 | 17638484 | 17538484 | 17738484 | 5 |
| Hs.149297  | 0 / 9 | 18863600 | 18763600 | 18963600 | 6 |
| DKFZp686C0 | 0 / 9 | 18867606 | 18767606 | 18967606 | 6 |
| PDHA1      | 0 / 6 | 19121707 | 19021707 | 19221707 | 7 |
| PDK3       | 0 / 9 | 24243071 | 24143071 | 24343071 | 8 |
| Hs.403937  | 0 / 9 | 24318005 | 24218005 | 24418005 | 8 |

**E 100K**

|        |       |         |         |         |   |
|--------|-------|---------|---------|---------|---|
| NLGN4X | 9 / 9 | 6005624 | 5905624 | 6105624 | 1 |
|--------|-------|---------|---------|---------|---|

|           |       |          |          |          |   |
|-----------|-------|----------|----------|----------|---|
| FLJ12417  | 9 / 9 | 6842305  | 6742305  | 6942305  | 2 |
| HDHD1A    | 8 / 9 | 6925883  | 6825883  | 7025883  | 2 |
| STS       | 9 / 9 | 6997232  | 6897232  | 7097232  | 2 |
| PNPLA4    | 9 / 9 | 7705179  | 7605179  | 7805179  | 3 |
| Hs.495641 | 9 / 9 | 8234774  | 8134774  | 8334774  | 4 |
| MGC17403  | 9 / 9 | 13430899 | 13330899 | 13530899 | 5 |
| RAB9A     | 9 / 9 | 13466997 | 13366997 | 13566997 | 5 |
| SEDL      | 9 / 9 | 13512374 | 13412374 | 13612374 | 5 |
| OFD1      | 6 / 6 | 13512536 | 13412536 | 13612536 | 5 |
| TMEM27    | 9 / 9 | 15442811 | 15342811 | 15542811 | 6 |
| CA5BL     | 9 / 9 | 15480672 | 15380672 | 15580672 | 6 |
| CA5B      | 9 / 9 | 15516081 | 15416081 | 15616081 | 6 |
| Hs.121592 | 9 / 9 | 15614002 | 15514002 | 15714002 | 6 |
| Hs.431654 | 9 / 9 | 15628315 | 15528315 | 15728315 | 6 |
| Hs.431102 | 9 / 9 | 16370147 | 16270147 | 16470147 | 7 |
| CALB3     | 9 / 9 | 16427937 | 16327937 | 16527937 | 7 |

**I 250K**

|        |       |          |          |          |   |
|--------|-------|----------|----------|----------|---|
| HCCS   | 0 / 9 | 10889118 | 10639118 | 11139118 | 1 |
| H48827 | 1 / 9 | 11030019 | 10780019 | 11280019 | 1 |
| FANCB  | 0 / 9 | 14650848 | 14400848 | 14900848 | 2 |
| MOSPD2 | 0 / 9 | 14651219 | 14401219 | 14901219 | 2 |
| POLA   | 0 / 9 | 24471720 | 24221720 | 24721720 | 3 |
| Z39260 | 0 / 9 | 24583884 | 24333884 | 24833884 | 3 |

**E 250K**

|           |       |          |          |          |   |
|-----------|-------|----------|----------|----------|---|
| NLGN4X    | 9 / 9 | 6005624  | 5755624  | 6255624  | 1 |
| FLJ12417  | 9 / 9 | 6842305  | 6592305  | 7092305  | 2 |
| HDHD1A    | 8 / 9 | 6925883  | 6675883  | 7175883  | 2 |
| STS       | 9 / 9 | 6997232  | 6747232  | 7247232  | 2 |
| Hs.186498 | 9 / 9 | 7123776  | 6873776  | 7373776  | 2 |
| N74477    | 8 / 9 | 7188013  | 6938013  | 7438013  | 2 |
| Hs.121592 | 9 / 9 | 15614002 | 15364002 | 15864002 | 3 |
| Hs.431654 | 9 / 9 | 15628315 | 15378315 | 15878315 | 3 |
| AP1S2     | 9 / 9 | 15632757 | 15382757 | 15882757 | 3 |
