# Supplementary material for: Genomic Environment Predicts Expression Patterns on the Human Inactive X Chromosome
Source: PubMed Central journal article supplement (PMC1584270; doi:10.1371/journal.pgen.0020151), 2006-09-29
Supplement: pgen.0020151.st002.pdf [file pgen.0020151.st002.pdf]

**Supplemental Table 2. The list of overrepresented oligomers.**

| overrepresented oligomers    | Repeat         | %     | labels | P value (autosomal test) |
|------------------------------|----------------|-------|--------|--------------------------|
| CAGGGATGCTGC                 | DNA/MER1_type  | 100   | Escape | 0                        |
| GAACATGTGGTATT               | LINE/L1        | 90.91 | Escape | 0.001                    |
| TCATGTCTAAAA                 | LINE/L1        | 80    | Escape | 0.12                     |
| AAACAAGAAATG                 | LINE/L1        | 60    | Escape | 0.03                     |
| ACAGAAAATCAA                 | LINE/L1        | 60    | Escape | 0.008                    |
| AAGGGAGGGAGG                 | Low_complexity | 60    | Escape | 0.023                    |
| CATCAGTTAAGG                 | LTR/ERV1       | 90    | Escape | 0.038                    |
| AAGCAAGATGGA                 | LTR/ERV1       | 80.95 | Escape | 0.002                    |
| AAATCAGTCTCC                 | LTR/ERV1       | 70    | Escape | 0                        |
| AGAACCCTCTCT                 | LTR/ERV1       | 70    | Escape | 0                        |
| TTTATTAAGAAA                 | LTR/ERV1       | 66.67 | Escape | 0.003                    |
| AAAGTGAAAGCA                 | LTR/ERV1       | 60    | Escape | 0                        |
| ATAATTTTGCAA                 | LTR/ERV1       | 60    | Escape | 0                        |
| CCTCCCATGACA                 | LTR/MaLR       | 100   | Escape | 0                        |
| ATCATGGGGGTG                 | LTR/MaLR       | 100   | Escape | 0.008                    |
| AATTGTAATCCCC                | LTR/MaLR       | 100   | Escape | 0.01                     |
| GGGTATGTCTTTATTA             | LTR/MaLR       | 98.67 | Escape | 0.001                    |
| TCTCATCTTGAA                 | LTR/MaLR       | 96.3  | Escape | 0.001                    |
| GAGCTACAATTCAAG              | LTR/MaLR       | 93.75 | Escape | 0.001                    |
| CAGACTAATACA                 | LTR/MaLR       | 92.86 | Escape | 0.043                    |
| AAGACATACCTG                 | LTR/MaLR       | 90    | Escape | 0.04                     |
| CAGCATGAGAACA                | LTR/MaLR       | 90    | Escape | 0                        |
| CTTTATAGCAGTGTGAAAATGGACTAAT | LTR/MaLR       | 86.82 | Escape | 0                        |
| CTGTGTCCCTCAC                | LTR/MaLR       | 84.62 | Escape | 0                        |
| TACAAGCCAAGGAG               | LTR/MaLR       | 84.38 | Escape | 0                        |
| CAGGTCCCTCCCA                | LTR/MaLR       | 82.61 | Escape | 0                        |
| CTCCCCAGCCAC                 | LTR/MaLR       | 80    | Escape | 0.001                    |
| AGAACTCACTCA                 | LTR/MaLR       | 80    | Escape | 0.032                    |
| GATAGATAGATAGATAGATA         | Simple_repeat  | 94.09 | Escape | 0                        |
| ACATATATGTAT                 | Simple_repeat  | 78.95 | Escape | 0.118                    |
| CTAGGCCTCCCA                 | SINE/Alu       | 100   | Escape | 0.105                    |
| TCGGGAGTTCAAGA               | SINE/Alu       | 100   | Escape | 0.096                    |
| AAGTGATTCTCG                 | SINE/Alu       | 100   | Escape | 0.029                    |
| GAGGCAGGGGAA                 | SINE/Alu       | 100   | Escape | 0.294                    |
| AGAGATGAGGTCT                | SINE/Alu       | 100   | Escape | 0.158                    |
| CCGCCCCGCTCG                 | SINE/Alu       | 100   | Escape | 0.245                    |
| CAGCGCTTTGGG                 | SINE/Alu       | 100   | Escape | 0.028                    |
| ACACACCACCAC                 | SINE/Alu       | 100   | Escape | 0.044                    |
| CAGCTCACCGCAA                | SINE/Alu       | 100   | Escape | 0.022                    |
| AGGTGGATCACG                 | SINE/Alu       | 100   | Escape | 0.196                    |
| CCACTATGCCTGG                | SINE/Alu       | 100   | Escape | 0.034                    |
| ACCTCCCAGGCT                 | SINE/Alu       | 100   | Escape | 0.122                    |
| CAAGGCAGGAGG                 | SINE/Alu       | 100   | Escape | 0.135                    |
| GAGCTATGATTGCACCAC           | SINE/Alu       | 100   | Escape | 0                        |
| GAICTAAGCAATCCACC            | SINE/Alu       | 100   | Escape | 0                        |
| AGATTGCTTGAGGCCA             | SINE/Alu       | 100   | Escape | 0.066                    |
| TACAGGTGCACACCACCA           | SINE/Alu       | 100   | Escape | 0.041                    |
| AGGTGTGCACCAC                | SINE/Alu       | 100   | Escape | 0.123                    |
| CAGCCTCCAACCTCTGG            | SINE/Alu       | 100   | Escape | 0                        |
| CCAGGAGGTTGAGGCTGCA          | SINE/Alu       | 99.38 | Escape | 0                        |
| AATTGCTTGAGCCTAGGAGTTCA      | SINE/Alu       | 98.18 | Escape | 0.005                    |
| CCTCATGATCCGCCC              | SINE/Alu       | 98    | Escape | 0.35                     |
| GGAGGCAGAGCTTGCACT           | SINE/Alu       | 97.3  | Escape | 0.49                     |
| GCAGCCTTGAACCTCC             | SINE/Alu       | 96.77 | Escape | 0.017                    |
| TGGTGGTGCACACCAC             | SINE/Alu       | 96.43 | Escape | 0.118                    |
| AAACTCCTGGCC                 | SINE/Alu       | 96.15 | Escape | 0.031                    |
| AGTTTGAGGCTG                 | SINE/Alu       | 95    | Escape | 0.003                    |
| CAGGCTCAAGCA                 | SINE/Alu       | 93.33 | Escape | 0.04                     |
| AGCTCAAGCAAT                 | SINE/Alu       | 91.67 | Escape | 0.044                    |
| CCCCATCTCTAAAA               | SINE/Alu       | 91.3  | Escape | 0.02                     |
| CCCAAGCAGCTGG                | SINE/Alu       | 90.91 | Escape | 0.046                    |
| CATCACTGCACTC                | SINE/Alu       | 87.88 | Escape | 0.096                    |
| CCAGCTACCTGGGA               | SINE/Alu       | 86.96 | Escape | 0.034                    |
| GGATTACAGACATG               | SINE/Alu       | 85.71 | Escape | 0.076                    |
| AAGAGGCTGAGGTGGAAGGAT        | SINE/Alu       | 84.75 | Escape | 0                        |

|                         |                |       |             |       |
|-------------------------|----------------|-------|-------------|-------|
| ACAGTGGTGTGA            | SINE/Alu       | 84.62 | Escape      | 0.002 |
| AGAGACAAGGTCTCA         | SINE/Alu       | 84.21 | Escape      | 0     |
| AGCTGGTCTTGA            | SINE/Alu       | 81.82 | Escape      | 0.009 |
| CCCTGTTTCTAC            | SINE/Alu       | 80    | Escape      | 0.082 |
| TCTCTATAAAAA            | SINE/Alu       | 78.57 | Escape      | 0.019 |
| CTACAAAAATAA            | SINE/Alu       | 66.67 | Escape      | 0     |
| AAAATACACAAA            | SINE/Alu       | 65.22 | Escape      | 0.033 |
| CAGTGGTTCTTCC           |                |       | Escape      | 0     |
| AAAGCCAGTTAC            |                |       | Escape      | 0     |
| AAACCATATCAC            |                |       | Escape      | 0     |
| GATTTTCAAAAA            | DNA/MER1_type  | 20    | Escape      | 0     |
| ATTATTATTTATTA          | DNA/MER1_type  | 13.64 | Escape      | 0.077 |
| GTTATTTAAAAA            | LINE/L1        | 40    | Escape      | 0.005 |
| AAAAGTTGAAAT            | LINE/L1        | 40    | Escape      | 0     |
| ATAAATGAATAA            | LINE/L1        | 36.36 | Escape      | 0.053 |
| CATTTATATAAAAATA        | LINE/L1        | 28.12 | Escape      | 0.001 |
| ATATATTTTCAT            | LINE/L1        | 21.43 | Escape      | 0     |
| ATAGGCCAGGCA            | LINE/L2        | 10    | Escape      | 0.008 |
| CCTTCCTCCTCC            | Low_complexity | 30    | Escape      | 0.023 |
| AGGAAGGAGGGA            | Low_complexity | 30    | Escape      | 0.097 |
| ATAAAATTTTAA            | Low_complexity | 28.57 | Escape      | 0.04  |
| ATTTATATTTTA            | Low_complexity | 26.92 | Escape      | 0.019 |
| TATAAATAAAAATTTAA       | Low_complexity | 21.54 | Escape      | 0.003 |
| TTTAAATTA AAA           | Low_complexity | 20    | Escape      | 0.221 |
| ATATTA AAAAAA           | Low_complexity | 20    | Escape      | 0.117 |
| ATTTTTTAATTA            | Low_complexity | 20    | Escape      | 0.043 |
| AGAGAAAAGAGAA           | Low_complexity | 20    | Escape      | 0.383 |
| AGGAGAAAAGGAA           | Low_complexity | 10    | Escape      | 0     |
| TTTTAAATAAATGCAT        | Low_complexity | 7.69  | Escape      | 0     |
| AGATAAAGGAAA            | LTR/ERV1       | 36.36 | Escape      | 0     |
| AATATTTGAAGA            | LTR/ERV1       | 30    | Escape      | 0.004 |
| CCAAAAATAAAA            | LTR/ERV1       | 18.18 | Escape      | 0.031 |
| AGAAGAAAATAA            | LTR/ERV1       | 15.38 | Escape      | 0.037 |
| ATGGTGGTGATG            | Simple_repeat  | 46.67 | Escape      | 0.024 |
| ATGTATATATAA            | Simple_repeat  | 46.67 | Escape      | 0.027 |
| AGAGAGAGGGAGG           | Simple_repeat  | 45.83 | Escape      | 0.049 |
| ACACACAGACACAC          | Simple_repeat  | 41.03 | Escape      | 0.047 |
| TTTATATATAAA            | Simple_repeat  | 40    | Escape      | 0.011 |
| AAAATAAATAATAA          | SINE/Alu       | 24.44 | Escape      | 0.101 |
| TCTTAAAAAGAAAAGGAA      | SINE/Alu       | 24.36 | Escape      | 0     |
| AAAAAGGAAAAG            | SINE/Alu       | 20    | Escape      | 0.176 |
| TAATAAAAAATA            | SINE/Alu       | 18.18 | Escape      | 0.087 |
| AAAACACACACA            | SINE/Alu       | 12.5  | Escape      | 0.067 |
| AATATTAATAAT            | SINE/Alu       | 10    | Escape      | 0.011 |
| TCAAAAGAAAAATAAT        | SINE/Alu       | 9.38  | Escape      | 0.096 |
| GATGTTTAGCAGCAT         | DNA/MER1_type  | 100   | Inactivated | 0     |
| GCATTTCTAACAAG          | DNA/MER1_type  | 98.46 | Inactivated | 0     |
| GTGGTTCTCAA             | DNA/MER1_type  | 83.33 | Inactivated | 0.002 |
| AGCAGCAGCAGC            | DNA/MER1_type  | 56.25 | Inactivated | 0.107 |
| TTACATAGGTATACA         | LINE/L1        | 100   | Inactivated | 0.01  |
| AGGGCATCCCTGTCTTGCC     | LINE/L1        | 100   | Inactivated | 0.044 |
| CAAGAGAAAGCA            | LINE/L1        | 100   | Inactivated | 0.095 |
| AATACCCTTTATTTTC        | LINE/L1        | 100   | Inactivated | 0.101 |
| GTCTCAGCCCAA            | LINE/L1        | 100   | Inactivated | 0.128 |
| AAGAGCTCCTGAA           | LINE/L1        | 100   | Inactivated | 0.032 |
| GGCAACCTACAA            | LINE/L1        | 100   | Inactivated | 0.046 |
| ATGCAAAAATCCTC          | LINE/L1        | 100   | Inactivated | 0.197 |
| CATCTATTGAGAT           | LINE/L1        | 100   | Inactivated | 0.465 |
| GTTGGATTCCCTA           | LINE/L1        | 100   | Inactivated | 0.317 |
| GACCAATGGAAC            | LINE/L1        | 100   | Inactivated | 0.171 |
| ATTTTCATCCATG           | LINE/L1        | 100   | Inactivated | 0.12  |
| TCTAGTTCTAGATCCCTGAGG   | LINE/L1        | 99.08 | Inactivated | 0.151 |
| AGCACCATTATTA AAA       | LINE/L1        | 97.22 | Inactivated | 0.04  |
| CCATGCTCATGGA           | LINE/L1        | 97.14 | Inactivated | 0.145 |
| AAACCTAGGCAATACCATTGAGG | LINE/L1        | 96.77 | Inactivated | 0.057 |
| CTCTGGCTGCCCTTAA        | LINE/L1        | 96.67 | Inactivated | 0.059 |
| TACAAGCCAGAAG           | LINE/L1        | 96.43 | Inactivated | 0.014 |

|                             |         |       |             |       |
|-----------------------------|---------|-------|-------------|-------|
| CTTGACTCTTTATC              | LINE/L1 | 96    | Inactivated | 0.008 |
| GCAAAACACATTCAAAAGCT        | LINE/L1 | 95.89 | Inactivated | 0.009 |
| TACAGTCCCACCAAC             | LINE/L1 | 95.83 | Inactivated | 0.114 |
| AGAAAATATTTGC               | LINE/L1 | 95    | Inactivated | 0.116 |
| AGGTTTGTCAA                 | LINE/L1 | 95    | Inactivated | 0.097 |
| GAAAACTGGCACAA              | LINE/L1 | 94.44 | Inactivated | 0.06  |
| AAAAGCTAGCAGAAGGCAAGAAATAAC | LINE/L1 | 94.44 | Inactivated | 0.017 |
| ATATCCAGCCAACTAAGCTTCATA    | LINE/L1 | 94.39 | Inactivated | 0.017 |
| CTTTCCATGTTTAGTGC           | LINE/L1 | 93.94 | Inactivated | 0.011 |
| GCATTAGGAGAAA               | LINE/L1 | 93.75 | Inactivated | 0.017 |
| ATGAACTCATCCTTT             | LINE/L1 | 93.75 | Inactivated | 0.044 |
| TAGAAAACCCCA                | LINE/L1 | 93.33 | Inactivated | 0.206 |
| TACATAATGGTAA               | LINE/L1 | 92.86 | Inactivated | 0.013 |
| AAAGGCCTTTGA                | LINE/L1 | 92.86 | Inactivated | 0.021 |
| GATCCCTTACC                 | LINE/L1 | 92.31 | Inactivated | 0.014 |
| ATGGGTCTTGAC                | LINE/L1 | 92.31 | Inactivated | 0.005 |
| TCCTGAAGGAAGC               | LINE/L1 | 92.11 | Inactivated | 0.019 |
| AAAACTGGAAGCA               | LINE/L1 | 92    | Inactivated | 0.196 |
| CAAGCAAATGCTGAGAG           | LINE/L1 | 91.89 | Inactivated | 0.024 |
| AGGAAGAAAATG                | LINE/L1 | 91.67 | Inactivated | 0.023 |
| AAAATCTCTCAG                | LINE/L1 | 91.67 | Inactivated | 0.028 |
| CAAAGGGAAGCC                | LINE/L1 | 91.67 | Inactivated | 0.02  |
| CCCCTTATGAG                 | LINE/L1 | 90.91 | Inactivated | 0.02  |
| ATGATCAAGTGG                | LINE/L1 | 90.91 | Inactivated | 0.059 |
| AACTCAGCTCTG                | LINE/L1 | 90.91 | Inactivated | 0.087 |
| CTATTCAACATAGTG             | LINE/L1 | 90.91 | Inactivated | 0.079 |
| CACACACCGGGG                | LINE/L1 | 90.91 | Inactivated | 0.004 |
| AATGGGCAAAAG                | LINE/L1 | 90    | Inactivated | 0.038 |
| AGTGTAATTAG                 | LINE/L1 | 90    | Inactivated | 0.052 |
| CAAAGAACATCTT               | LINE/L1 | 90    | Inactivated | 0.078 |
| GCTAACATCATA                | LINE/L1 | 90    | Inactivated | 0.049 |
| CTAATGTTGACA                | LINE/L1 | 90    | Inactivated | 0.01  |
| AATATCCCTGAT                | LINE/L1 | 90    | Inactivated | 0.067 |
| GCAAACTATCAC                | LINE/L1 | 90    | Inactivated | 0.005 |
| TTAGAAGGAAAA                | LINE/L1 | 90    | Inactivated | 0.125 |
| CTCTGGGACACA                | LINE/L1 | 90    | Inactivated | 0.2   |
| ACCTGAGAAAAA                | LINE/L1 | 90    | Inactivated | 0.07  |
| AAACTGCATCAAC               | LINE/L1 | 88.46 | Inactivated | 0.003 |
| GGAGAAATACCTA               | LINE/L1 | 87.5  | Inactivated | 0.012 |
| TCATCATCACTGG               | LINE/L1 | 87.5  | Inactivated | 0.267 |
| CATGCTAAAAAC                | LINE/L1 | 86.36 | Inactivated | 0.075 |
| AAGAATGTTGAATA              | LINE/L1 | 86.05 | Inactivated | 0.011 |
| TATACAAAAATCCTCA            | LINE/L1 | 85.71 | Inactivated | 0.032 |
| CTTTTCTGCATC                | LINE/L1 | 85.71 | Inactivated | 0.123 |
| TGCAGAGACACAC               | LINE/L1 | 85.29 | Inactivated | 0.001 |
| GAAAGGAACAAC                | LINE/L1 | 85    | Inactivated | 0.021 |
| TCATCCCTGGGA                | LINE/L1 | 83.33 | Inactivated | 0.226 |
| ACATGCACACAT                | LINE/L1 | 81.82 | Inactivated | 0.07  |
| CTTAAATGTAATA               | LINE/L1 | 81.25 | Inactivated | 0.015 |
| AAGAAAAGAATTTT              | LINE/L1 | 80.43 | Inactivated | 0.002 |
| AGGGACAATTTG                | LINE/L1 | 80    | Inactivated | 0.128 |
| CAGGCAGGAGAA                | LINE/L1 | 80    | Inactivated | 0.051 |
| ATGGAGCTGAAA                | LINE/L1 | 80    | Inactivated | 0.138 |
| CACCACCAGGCC                | LINE/L1 | 80    | Inactivated | 0.015 |
| AGCATGATGCCT                | LINE/L1 | 80    | Inactivated | 0.009 |
| AGTTTTTTCCAA                | LINE/L1 | 80    | Inactivated | 0.368 |
| ATTTTTTATTGC                | LINE/L1 | 76.92 | Inactivated | 0.036 |
| AAAGAAGGCCAT                | LINE/L1 | 75    | Inactivated | 0.011 |
| AATTTCTGTTCT                | LINE/L1 | 72.73 | Inactivated | 0.019 |
| TAACAATATTAA                | LINE/L1 | 72.73 | Inactivated | 0.375 |
| AATGAAGGAAAAA               | LINE/L1 | 71.88 | Inactivated | 0.011 |
| AAAAACAAGCAATG              | LINE/L1 | 71.05 | Inactivated | 0.061 |
| GAGAAAAGAAATA               | LINE/L1 | 68.75 | Inactivated | 0.05  |
| AGACAAAAACCA                | LINE/L1 | 66.67 | Inactivated | 0.033 |
| CCATTTATTGAATA              | LINE/L1 | 65    | Inactivated | 0.046 |
| TGGAAAACAAAAA               | LINE/L1 | 64.29 | Inactivated | 0.011 |
| AAAAACATGCCA                | LINE/L1 | 60    | Inactivated | 0.003 |

|                |                |       |             |       |
|----------------|----------------|-------|-------------|-------|
| CAGAAATAATAC   | LINE/L1        | 60    | Inactivated | 0.005 |
| AATGGAAAAACA   | LINE/L1        | 50    | Inactivated | 0.052 |
| AAAAAATCAACT   | LINE/L1        | 50    | Inactivated | 0     |
| GTGCTGGCACA    | LINE/L2        | 58.33 | Inactivated | 0.176 |
| CCTAATCACCTC   | LTR/MaLR       | 100   | Inactivated | 0     |
| ATCCAGGATAAT   | LTR/MaLR       | 100   | Inactivated | 0     |
| GTGAGAACTCAC   | LTR/MaLR       | 100   | Inactivated | 0.006 |
| CAGGTTGGTCTC   | SINE/Alu       | 100   | Inactivated | 0.076 |
| GTGATCCGCCACC  | SINE/Alu       | 100   | Inactivated | 0.338 |
| AAGGTCAGGAGT   | SINE/Alu       | 100   | Inactivated | 0.402 |
| GTACCACTGCAC   | SINE/Alu       | 96.15 | Inactivated | 0.087 |
| GAGATGGTGCCAC  | SINE/Alu       | 95    | Inactivated | 0.047 |
| AGCTCACGCCTG   | SINE/Alu       | 92.31 | Inactivated | 0.04  |
| CTGAGGTCAAGA   | SINE/Alu       | 91.67 | Inactivated | 0.052 |
| ACTTCACTCCAG   | SINE/Alu       | 90    | Inactivated | 0.016 |
| AGTTTGAGGCCA   | SINE/Alu       | 90    | Inactivated | 0.002 |
| TCTCCCGCCTCA   | SINE/Alu       | 83.33 | Inactivated | 0.137 |
| ACAGAGAGAGACT  | SINE/Alu       | 76.67 | Inactivated | 0.026 |
| CAAAAAAAAAAGA  | SINE/Alu       | 58.33 | Inactivated | 0.252 |
| AAATGGGGATAA   | SINE/MIR       | 100   | Inactivated | 0.045 |
| CTCATTTAATCC   | SINE/MIR       | 90    | Inactivated | 0.054 |
| TCATCTGTAAAA   | SINE/MIR       | 84.62 | Inactivated | 0.499 |
| GGGCCGGGCGCA   |                |       | Inactivated | 0     |
| AAAAATGTTTAA   |                |       | Inactivated | 0     |
| AATTTTAAAAGG   | DNA/MER2_type  | 10    | Inactivated | 0     |
| AGAAATAGGAAT   | LINE/L1        | 40    | Inactivated | 0.003 |
| AGAAATAAAAAG   | LINE/L1        | 40    | Inactivated | 0.011 |
| TGATTTCTTTTTCA | LINE/L1        | 35.48 | Inactivated | 0.02  |
| AAAACAAAGCAA   | LINE/L1        | 33.33 | Inactivated | 0.011 |
| AACATTTATTGATT | LINE/L1        | 30.43 | Inactivated | 0.066 |
| TAAATATATTCA   | LINE/L1        | 30    | Inactivated | 0.001 |
| AAGTATTTTATT   | LINE/L1        | 30    | Inactivated | 0.123 |
| CTCCCCACCCCC   | LINE/L1        | 27.27 | Inactivated | 0.018 |
| AAATTTAAAAAC   | LINE/L1        | 20    | Inactivated | 0     |
| AAAAAGATAAAA   | LINE/L1        | 20    | Inactivated | 0.022 |
| CAAAATATTTTC   | LINE/L1        | 20    | Inactivated | 0.006 |
| AGCTTTTTAAAA   | LINE/L1        | 16    | Inactivated | 0     |
| AAATAAAATGGA   | LINE/L1        | 10    | Inactivated | 0.005 |
| AAAAAAAAGTCC   | LINE/L1        | 10    | Inactivated | 0.049 |
| ATATTTATTAAG   | LINE/L2        | 30    | Inactivated | 0.001 |
| AGGAAGGAAAAG   | Low_complexity | 30    | Inactivated | 0.016 |
| ATTTTCATTTTC   | LTR/ERVL       | 9.09  | Inactivated | 0.006 |
| AAAATGAAATTA   | LTR/ERVL       | 9.09  | Inactivated | 0.032 |
| AGAAGAAGAAGAA  | Simple_repeat  | 20.48 | Inactivated | 0.121 |
| AAAAATTCAAAA   | SINE/Alu       | 38.89 | Inactivated | 0.008 |
| AAAATTTAAAAG   | SINE/Alu       | 30    | Inactivated | 0.058 |
| ATTTTTTTGAAA   | SINE/Alu       | 10    | Inactivated | 0.005 |
| TTTAAACAAAAA   | SINE/Alu       | 7.69  | Inactivated | 0.036 |
| AAAATTCAAAT    | SINE/MIR       | 10    | Inactivated | 0.012 |
