# Supplementary material for: Genomic Environment Predicts Expression Patterns on the Human Inactive X Chromosome
Source: PubMed Central journal article supplement (PMC1584270; doi:10.1371/journal.pgen.0020151), 2006-09-29
Supplement: pgen.0020151.st003.pdf [file pgen.0020151.st003.pdf]

**Supplemental Table 3. The lists of genes in training and test data sets.** Genes added to Xp22 training set are shown in blue.

| 50K             |        | 100K            |             | 250K            |             |
|-----------------|--------|-----------------|-------------|-----------------|-------------|
| <b>Training</b> |        | <b>Training</b> |             | <b>Training</b> |             |
| NLGN4X          | Escape | Hs.187608       | Inactivated | HCCS            | Inactivated |
| HDHD1A          | Escape | MID1            | Inactivated | H48827          | Inactivated |
| FLJ12417        | Escape | HCCS            | Inactivated | FANCB           | Inactivated |
| STS             | Escape | H48827          | Inactivated | MOSPD2          | Inactivated |
| Hs.186498       | Escape | GLRA2           | Inactivated | POLA            | Inactivated |
| N74477          | Escape | FANCB           | Inactivated | Z39260          | Inactivated |
| Hs.495638       | Escape | MOSPD2          | Inactivated | NLGN4X          | Escape      |
| PNPLA4          | Escape | RAI2            | Inactivated | HDHD1A          | Escape      |
| Hs.495641       | Escape | Hs.149297       | Inactivated | FLJ12417        | Escape      |
| MGC17403        | Escape | DKFZp686C       | Inactivated | STS             | Escape      |
| RAB9A           | Escape | PDHA1           | Inactivated | Hs.186498       | Escape      |
| SEDL            | Escape | PDK3            | Inactivated | N74477          | Escape      |
| OFD1            | Escape | Hs.403937       | Inactivated | AP1S2           | Escape      |
| GPM6B           | Escape | NLGN4X          | Escape      | Hs.121592       | Escape      |
| Hs.41434        | Escape | FLJ12417        | Escape      | Hs.431654       | Escape      |
| AA952971        | Escape | HDHD1A          | Escape      | PRRG1           | Inactivated |
| FAM51A1         | Escape | STS             | Escape      | TCTE1L          | Inactivated |
| PIR             | Escape | PNPLA4          | Escape      | SRPX            | Inactivated |
| TMEM27          | Escape | Hs.495641       | Escape      | TM4SF2          | Inactivated |
| CA5BL           | Escape | MGC17403        | Escape      | CHST7           | Inactivated |
| CA5B            | Escape | RAB9A           | Escape      | EBP             | Inactivated |
| AP1S2           | Escape | SEDL            | Escape      | OATL1           | Inactivated |
| Hs.121592       | Escape | OFD1            | Escape      | RBM3            | Inactivated |
| Hs.431654       | Escape | TMEM27          | Escape      | SUV39H1         | Inactivated |
| CTPS2           | Escape | CA5BL           | Escape      | TIMM17B         | Inactivated |
| Hs.431102       | Escape | CA5B            | Escape      | OPHN1           | Inactivated |
| CALB3           | Escape | Hs.121592       | Escape      | DLG3            | Inactivated |
| SYAP1           | Escape | Hs.431654       | Escape      | ZNF261          | Inactivated |
| CXORF15         | Escape | Hs.431102       | Escape      | FSHPRH1         | Inactivated |
| RBBP7           | Escape | CALB3           | Escape      | ARMCX3          | Inactivated |

|               |             |                   |             |                   |             |
|---------------|-------------|-------------------|-------------|-------------------|-------------|
| ZFX           | Escape      | PRRG1             | Inactivated | AA663726          | Inactivated |
| ARSD          | Escape      | TCTE1L            | Inactivated | FHL1              | Inactivated |
| USP9X         | Escape      | SRPX              | Inactivated | HTATSF1           | Inactivated |
| DUSP21        | Escape      | TM4SF2            | Inactivated | FMR1              | Inactivated |
| MID1          | Inactivated | GPR34             | Inactivated | IDS               | Inactivated |
| Hs.187608     | Inactivated | CHST7             | Inactivated | CD99L2            | Inactivated |
| HCCS          | Inactivated | PHF16             | Inactivated | CETN2             | Inactivated |
| ARHGAP6       | Inactivated | ZNF41             | Inactivated | TMLHE             | Inactivated |
| H48827        | Inactivated | EBP               | Inactivated | ARSD              | Escape      |
| PRPS2         | Inactivated | OATL1             | Inactivated | SEDL              | Escape      |
| GLRA2         | Inactivated | RBM3              | Inactivated | GPM6B             | Escape      |
| FANCB         | Inactivated | SUV39H1           | Inactivated | DUSP21            | Escape      |
| MOSPD2        | Inactivated | TIMM17B           | Inactivated | <b>other Xp22</b> |             |
| RAI2          | Inactivated | OPHN1             | Inactivated | KIAA1280          | Inactivated |
| SCML2         | Inactivated | DLG3              | Inactivated | MID1              | Inactivated |
| Hs.220888     | Inactivated | ZNF261            | Inactivated | Hs.187608         | Inactivated |
| Hs.149297     | Inactivated | Hs.374460         | Inactivated | ARHGAP6           | Inactivated |
| DKFZp686C0388 | Inactivated | FSHPRH1           | Inactivated | M62076            | Inactivated |
| PDHA1         | Inactivated | ARMCX3            | Inactivated | SCML1             | Inactivated |
| CXorf23       | Inactivated | AA663726          | Inactivated | RAI2              | Inactivated |
| RPS6KA3       | Inactivated | ZNF75             | Inactivated | SCML2             | Inactivated |
| YY2           | Inactivated | FHL1              | Inactivated | Hs.220888         | Inactivated |
| SMS           | Inactivated | HTATSF1           | Inactivated | Hs.149297         | Inactivated |
| FLJ37866      | Inactivated | FMR1              | Inactivated | DKFZp686C         | Inactivated |
| AA601738      | Inactivated | IDS               | Inactivated | YY2               | Inactivated |
| PDK3          | Inactivated | CD99L2            | Inactivated | FLJ37866          | Inactivated |
| Hs.403937     | Inactivated | CETN2             | Inactivated | XG                | Escape      |
| POLA          | Inactivated | VBP1              | Inactivated | GYG2              | Escape      |
| Z39260        | Inactivated | TMLHE             | Inactivated | ARSE              | Escape      |
| PIGA          | Inactivated | ARSD              | Escape      | Hs.399941         | Escape      |
| PRRG1         | Inactivated | GPM6B             | Escape      | Hs.495638         | Escape      |
| TCTE1L        | Inactivated | USP9X             | Escape      | PNPLA4            | Escape      |
| SRPX          | Inactivated | DUSP21            | Escape      | Hs.495641         | Escape      |
| TM4SF2        | Inactivated | <b>other Xp22</b> |             | Hs.348675         | Escape      |
| GPR34         | Inactivated | KIAA1280          | Inactivated | MGC17403          | Escape      |

|                   |             |
|-------------------|-------------|
| CHST7             | Inactivated |
| PHF16             | Inactivated |
| ZNF41             | Inactivated |
| EBP               | Inactivated |
| OATL1             | Inactivated |
| RBM3              | Inactivated |
| SUV39H1           | Inactivated |
| TIMM17B           | Inactivated |
| OPHN1             | Inactivated |
| DLG3              | Inactivated |
| ZNF261            | Inactivated |
| Hs.374460         | Inactivated |
| FSHPRH1           | Inactivated |
| ARMCX3            | Inactivated |
| AA663726          | Inactivated |
| ZNF75             | Inactivated |
| FHL1              | Inactivated |
| HTATSF1           | Inactivated |
| FMR1              | Inactivated |
| IDS               | Inactivated |
| CD99L2            | Inactivated |
| CETN2             | Inactivated |
| IRAK1             | Inactivated |
| MECP2             | Inactivated |
| DNASE1L1          | Inactivated |
| ATP6AP1           | Inactivated |
| VBP1              | Inactivated |
| TMLHE             | Inactivated |
| <b>other Xp22</b> |             |
| KIAA1280          | Inactivated |
| M62076            | Inactivated |
| EUROIMAGE         | Inactivated |
| SCML1             | Inactivated |
| PRDX4             | Inactivated |
| SAT               | Inactivated |

|                |             |
|----------------|-------------|
| ARHGAP6        | Inactivated |
| M62076         | Inactivated |
| SCML1          | Inactivated |
| SCML2          | Inactivated |
| Hs.220888      | Inactivated |
| YY2            | Inactivated |
| FLJ37866       | Inactivated |
| PRDX4          | Inactivated |
| SAT            | Inactivated |
| PCYT1B         | Inactivated |
| POLA           | Inactivated |
| Z39260         | Inactivated |
| XG             | Escape      |
| GYG2           | Escape      |
| ARSE           | Escape      |
| Hs.399941      | Escape      |
| Hs.186498      | Escape      |
| N74477         | Escape      |
| Hs.495638      | Escape      |
| Hs.348675      | Escape      |
| Hs.41434       | Escape      |
| AA952971       | Escape      |
| FAM51A1        | Escape      |
| AP1S2          | Escape      |
| CTPS2          | Escape      |
| SYAP1          | Escape      |
| CXORF15        | Escape      |
| RBBP7          | Escape      |
| <b>other X</b> |             |
| GK             | Inactivated |
| DMD            | Inactivated |
| AA461044       | Inactivated |
| TM4SF10        | Inactivated |
| FLJ42925       | Inactivated |
| SYTL5          | Inactivated |

|                |             |
|----------------|-------------|
| RAB9A          | Escape      |
| Hs.41434       | Escape      |
| AA952971       | Escape      |
| CTPS2          | Escape      |
| Hs.431102      | Escape      |
| CALB3          | Escape      |
| SYAP1          | Escape      |
| CXORF15        | Escape      |
| RBBP7          | Escape      |
| <b>other X</b> |             |
| GK             | Inactivated |
| DMD            | Inactivated |
| AA461044       | Inactivated |
| TM4SF10        | Inactivated |
| FLJ42925       | Inactivated |
| SYTL5          | Inactivated |
| Hs.61438       | Inactivated |
| OTC            | Inactivated |
| Hs.167510      | Inactivated |
| MIG12          | Inactivated |
| FLJ43479       | Inactivated |
| FLJ20344       | Inactivated |
| FLJ31752       | Inactivated |
| ZC35F11        | Inactivated |
| ZNF81          | Inactivated |
| ZNF21          | Inactivated |
| SLC38A5        | Inactivated |
| FTSJ1          | Inactivated |
| PORCN          | Inactivated |
| Hs.432724      | Inactivated |
| WDR13          | Inactivated |
| GATA1          | Inactivated |
| PCSK1N         | Inactivated |
| SLC35A2        | Inactivated |
| PIM2           | Inactivated |

|                |             |           |             |           |             |
|----------------|-------------|-----------|-------------|-----------|-------------|
| PCYT1B         | Inactivated | Hs.61438  | Inactivated | DKFZp761A | Inactivated |
| XG             | Escape      | OTC       | Inactivated | Hs.443531 | Inactivated |
| GYG2           | Escape      | Hs.167510 | Inactivated | KCND1     | Inactivated |
| ARSE           | Escape      | MIG12     | Inactivated | GRIPAP1   | Inactivated |
| Hs.399941      | Escape      | FLJ43479  | Inactivated | TFE3      | Inactivated |
| Hs.348675      | Escape      | FLJ20344  | Inactivated | JM11      | Inactivated |
| <b>other X</b> |             | FLJ31752  | Inactivated | JM4       | Inactivated |
| GK             | Inactivated | ZC35F11   | Inactivated | WDRX1     | Inactivated |
| DMD            | Inactivated | SLC9A7    | Inactivated | Hs.496105 | Inactivated |
| AA461044       | Inactivated | RP2       | Inactivated | GPKOW     | Inactivated |
| TM4SF10        | Inactivated | SYN1      | Inactivated | FLJ21687  | Inactivated |
| FLJ42925       | Inactivated | PFC       | Inactivated | PLP2      | Inactivated |
| SYTL5          | Inactivated | UXT       | Inactivated | CACNA1F   | Inactivated |
| Hs.61438       | Inactivated | ZNF81     | Inactivated | JM1       | Inactivated |
| OTC            | Inactivated | ZNF21     | Inactivated | FOXP3     | Inactivated |
| Hs.167510      | Inactivated | SLC38A5   | Inactivated | PPP1R3F   | Inactivated |
| MIG12          | Inactivated | FTSJ1     | Inactivated | LOC158572 | Inactivated |
| FLJ43479       | Inactivated | PORCN     | Inactivated | CLCN5     | Inactivated |
| FLJ22219       | Inactivated | Hs.432724 | Inactivated | KIAA1202  | Inactivated |
| FLJ20344       | Inactivated | WDR13     | Inactivated | NUDT10    | Inactivated |
| FLJ31752       | Inactivated | GATA1     | Inactivated | LOC340602 | Inactivated |
| ZC35F11        | Inactivated | PCSK1N    | Inactivated | NUDT11    | Inactivated |
| SLC9A7         | Inactivated | SLC35A2   | Inactivated | GSPT2     | Inactivated |
| RP2            | Inactivated | PIM2      | Inactivated | PHF8      | Inactivated |
| Hs.371977      | Inactivated | DKFZp761A | Inactivated | Hs.347445 | Inactivated |
| RGN            | Inactivated | Hs.443531 | Inactivated | FLJ42662  | Inactivated |
| SYN1           | Inactivated | KCND1     | Inactivated | PRKWNK3   | Inactivated |
| PFC            | Inactivated | GRIPAP1   | Inactivated | DT1P1A10  | Inactivated |
| UXT            | Inactivated | TFE3      | Inactivated | FGD1      | Inactivated |
| ZNF81          | Inactivated | JM11      | Inactivated | FLJ10613  | Inactivated |
| ZNF21          | Inactivated | JM4       | Inactivated | MAGED2    | Inactivated |
| SLC38A5        | Inactivated | WDRX1     | Inactivated | PFKFB1    | Inactivated |
| FTSJ1          | Inactivated | Hs.496105 | Inactivated | Hs.13041  | Inactivated |
| PORCN          | Inactivated | GPKOW     | Inactivated | APEX2     | Inactivated |
| Hs.432724      | Inactivated | FLJ21687  | Inactivated | ALAS2     | Inactivated |

|              |             |           |             |           |             |
|--------------|-------------|-----------|-------------|-----------|-------------|
| WDR13        | Inactivated | PLP2      | Inactivated | LOC90736  | Inactivated |
| GATA1        | Inactivated | CACNA1F   | Inactivated | MAGEH1    | Inactivated |
| PCSK1N       | Inactivated | JM1       | Inactivated | Hs.40061  | Inactivated |
| SLC35A2      | Inactivated | FOXP3     | Inactivated | W68846    | Inactivated |
| PIM2         | Inactivated | PPP1R3F   | Inactivated | KLF8      | Inactivated |
| DKFZp761A052 | Inactivated | LOC158572 | Inactivated | DKFZp686L | Inactivated |
| Hs.443531    | Inactivated | CLCN5     | Inactivated | SPIN3     | Inactivated |
| KCND1        | Inactivated | KIAA1202  | Inactivated | SPIN2     | Inactivated |
| GRIPAP1      | Inactivated | NUDT10    | Inactivated | ZXDB      | Inactivated |
| TFE3         | Inactivated | LOC340602 | Inactivated | CXORF39   | Inactivated |
| JM11         | Inactivated | NUDT11    | Inactivated | LOC92249  | Inactivated |
| JM4          | Inactivated | GSPT2     | Inactivated | ASB12     | Inactivated |
| WDRX1        | Inactivated | UREB1     | Inactivated | Hs.38448  | Inactivated |
| Hs.496105    | Inactivated | PHF8      | Inactivated | MTMR8     | Inactivated |
| GPKOW        | Inactivated | Hs.347445 | Inactivated | HCA127    | Inactivated |
| FLJ21687     | Inactivated | FLJ42662  | Inactivated | YB62F01   | Inactivated |
| PLP2         | Inactivated | PRKWNK3   | Inactivated | MGC21416  | Inactivated |
| CACNA1F      | Inactivated | DT1P1A10  | Inactivated | STARD8    | Inactivated |
| JM1          | Inactivated | FGD1      | Inactivated | EFNB1     | Inactivated |
| FOXP3        | Inactivated | FLJ10613  | Inactivated | PJA1      | Inactivated |
| PPP1R3F      | Inactivated | MAGED2    | Inactivated | ED1       | Inactivated |
| LOC158572    | Inactivated | PFKFB1    | Inactivated | IGBP1     | Inactivated |
| CLCN5        | Inactivated | Hs.13041  | Inactivated | Hs.442732 | Inactivated |
| KIAA1202     | Inactivated | APEX2     | Inactivated | Hs.221457 | Inactivated |
| NUDT10       | Inactivated | ALAS2     | Inactivated | ARR3      | Inactivated |
| LOC340602    | Inactivated | LOC90736  | Inactivated | SNX12     | Inactivated |
| NUDT11       | Inactivated | MAGEH1    | Inactivated | TNRC11    | Inactivated |
| GSPT2        | Inactivated | Hs.40061  | Inactivated | NLGN3     | Inactivated |
| SREB3        | Inactivated | W68846    | Inactivated | ITGB1BP2  | Inactivated |
| HADH2        | Inactivated | KLF8      | Inactivated | OGT       | Inactivated |
| UREB1        | Inactivated | DKFZp686L | Inactivated | ACRC      | Inactivated |
| PHF8         | Inactivated | SPIN3     | Inactivated | CXCR3     | Inactivated |
| Hs.347445    | Inactivated | SPIN2     | Inactivated | NAP1L2    | Inactivated |
| FLJ42662     | Inactivated | ZXDB      | Inactivated | RNF12     | Inactivated |
| PRKWNK3      | Inactivated | CXORF39   | Inactivated | KIAA2022  | Inactivated |

|                |             |           |             |           |             |
|----------------|-------------|-----------|-------------|-----------|-------------|
| DT1P1A10       | Inactivated | LOC92249  | Inactivated | Hs.353890 | Inactivated |
| FGD1           | Inactivated | ASB12     | Inactivated | CXorf26   | Inactivated |
| FLJ10613       | Inactivated | Hs.38448  | Inactivated | DKFZp564K | Inactivated |
| MAGED2         | Inactivated | MTMR8     | Inactivated | PGK1      | Inactivated |
| PFKFB1         | Inactivated | HCA127    | Inactivated | TAF9L     | Inactivated |
| Hs.13041       | Inactivated | YB62F01   | Inactivated | GPR23     | Inactivated |
| APEX2          | Inactivated | MGC21416  | Inactivated | FLJ13042  | Inactivated |
| ALAS2          | Inactivated | STARD8    | Inactivated | RPS6KA6   | Inactivated |
| LOC90736       | Inactivated | EFNB1     | Inactivated | UNQ8193   | Inactivated |
| MAGEH1         | Inactivated | PJA1      | Inactivated | SATL1     | Inactivated |
| Hs.40061       | Inactivated | ED1       | Inactivated | TM4SF6    | Inactivated |
| W68846         | Inactivated | IGBP1     | Inactivated | CSTF2     | Inactivated |
| KLF8           | Inactivated | Hs.442732 | Inactivated | Hs.193951 | Inactivated |
| DKFZp686L07201 | Inactivated | Hs.221457 | Inactivated | FLJ12687  | Inactivated |
| SPIN3          | Inactivated | ARR3      | Inactivated | FLJ14084  | Inactivated |
| SPIN2          | Inactivated | SNX12     | Inactivated | DRP2      | Inactivated |
| ZXDB           | Inactivated | TNRC11    | Inactivated | Hs.381211 | Inactivated |
| CXORF39        | Inactivated | NLGN3     | Inactivated | HNRPH2    | Inactivated |
| LOC92249       | Inactivated | ITGB1BP2  | Inactivated | ARMCX1    | Inactivated |
| ASB12          | Inactivated | OGT       | Inactivated | FLJ20811  | Inactivated |
| Hs.38448       | Inactivated | ACRC      | Inactivated | YO64F11   | Inactivated |
| MTMR8          | Inactivated | CXCR3     | Inactivated | Hs.303060 | Inactivated |
| HCA127         | Inactivated | PHKA1     | Inactivated | ARMCX2    | Inactivated |
| FLJ34366       | Inactivated | NAP1L2    | Inactivated | my048     | Inactivated |
| FLJ12525       | Inactivated | CHIC1     | Inactivated | TMSNB     | Inactivated |
| YB62F01        | Inactivated | FLJ26979  | Inactivated | FLJ12969  | Inactivated |
| MGC21416       | Inactivated | Hs.118526 | Inactivated | GPRASP2   | Inactivated |
| STARD8         | Inactivated | DKFZp586J | Inactivated | Hs.496518 | Inactivated |
| EFNB1          | Inactivated | FLJ46440  | Inactivated | Hs.53997  | Inactivated |
| PJA1           | Inactivated | RNF12     | Inactivated | BEXL1     | Inactivated |
| ED1            | Inactivated | KIAA2022  | Inactivated | MGC45400  | Inactivated |
| IGBP1          | Inactivated | Hs.353890 | Inactivated | BEX2      | Inactivated |
| Hs.442732      | Inactivated | CXorf26   | Inactivated | MGC23947  | Inactivated |
| Hs.221457      | Inactivated | DKFZp564K | Inactivated | NGFRAP1   | Inactivated |
| ARR3           | Inactivated | PGK1      | Inactivated | TCEAL1    | Inactivated |

|               |             |           |             |           |             |
|---------------|-------------|-----------|-------------|-----------|-------------|
| SNX12         | Inactivated | TAF9L     | Inactivated | PLP1      | Inactivated |
| TNRC11        | Inactivated | GPR23     | Inactivated | RAB9B     | Inactivated |
| NLGN3         | Inactivated | FLJ13042  | Inactivated | MGC39900  | Inactivated |
| ITGB1BP2      | Inactivated | RPS6KA6   | Inactivated | Hs.110168 | Inactivated |
| OGT           | Inactivated | UNQ8193   | Inactivated | DKFZp686C | Inactivated |
| ACRC          | Inactivated | SATL1     | Inactivated | FLJ36333  | Inactivated |
| CXCR3         | Inactivated | TM4SF6    | Inactivated | LOC139231 | Inactivated |
| RGAG4         | Inactivated | CSTF2     | Inactivated | FLJ33516  | Inactivated |
| PHKA1         | Inactivated | Hs.193951 | Inactivated | FLJ10178  | Inactivated |
| NAP1L2        | Inactivated | FLJ12687  | Inactivated | FLJ20298  | Inactivated |
| CHIC1         | Inactivated | FLJ14084  | Inactivated | LOC92129  | Inactivated |
| FLJ44396      | Inactivated | DRP2      | Inactivated | CLDN2     | Inactivated |
| DKFZp686K1098 | Inactivated | Hs.381211 | Inactivated | ZCWCC2    | Inactivated |
| FLJ26979      | Inactivated | HNRPH2    | Inactivated | AI650369  | Inactivated |
| Hs.118526     | Inactivated | ARMCX1    | Inactivated | H66935    | Inactivated |
| DKFZp586J1922 | Inactivated | FLJ20811  | Inactivated | PRPS1     | Inactivated |
| FLJ46440      | Inactivated | YO64F11   | Inactivated | DSIPI     | Inactivated |
| RNF12         | Inactivated | Hs.303060 | Inactivated | MID2      | Inactivated |
| KIAA2022      | Inactivated | ARMCX2    | Inactivated | FLJ37392  | Inactivated |
| Hs.353890     | Inactivated | my048     | Inactivated | FLJ41813  | Inactivated |
| CXorf26       | Inactivated | TMSNB     | Inactivated | PSMD10    | Inactivated |
| DKFZp564K142  | Inactivated | FLJ12969  | Inactivated | APG4A     | Inactivated |
| PGK1          | Inactivated | GPRASP2   | Inactivated | KCNE1L    | Inactivated |
| TAF9L         | Inactivated | Hs.496518 | Inactivated | CHRDL1    | Inactivated |
| GPR23         | Inactivated | Hs.53997  | Inactivated | AMOT      | Inactivated |
| FLJ13042      | Inactivated | BEXL1     | Inactivated | LRCH2     | Inactivated |
| RPS6KA6       | Inactivated | MGC45400  | Inactivated | KLHL13    | Inactivated |
| UNQ8193       | Inactivated | BEX2      | Inactivated | DKFZp686L | Inactivated |
| SATL1         | Inactivated | MGC23947  | Inactivated | Hs.186704 | Inactivated |
| TM4SF6        | Inactivated | NGFRAP1   | Inactivated | IL13RA1   | Inactivated |
| CSTF2         | Inactivated | TCEAL1    | Inactivated | RNF127    | Inactivated |
| Hs.193951     | Inactivated | PLP1      | Inactivated | Hs.175048 | Inactivated |
| FLJ12687      | Inactivated | RAB9B     | Inactivated | PGRMC1    | Inactivated |
| FLJ14084      | Inactivated | MGC39900  | Inactivated | UBE2A     | Inactivated |
| DRP2          | Inactivated | Hs.110168 | Inactivated | Hs.496662 | Inactivated |

|               |             |           |             |           |             |
|---------------|-------------|-----------|-------------|-----------|-------------|
| Hs.381211     | Inactivated | DKFZp686C | Inactivated | NRF       | Inactivated |
| HNRPH2        | Inactivated | FLJ36333  | Inactivated | Hs.178536 | Inactivated |
| ARMCX1        | Inactivated | LOC139231 | Inactivated | RPL39     | Inactivated |
| FLJ20811      | Inactivated | FLJ33516  | Inactivated | ZNF183    | Inactivated |
| YO64F11       | Inactivated | FLJ10178  | Inactivated | AKAP28    | Inactivated |
| Hs.303060     | Inactivated | FLJ20298  | Inactivated | NKAP      | Inactivated |
| ARMCX2        | Inactivated | LOC92129  | Inactivated | PEPP.2.   | Inactivated |
| my048         | Inactivated | CLDN2     | Inactivated | ZBTB33    | Inactivated |
| TMSNB         | Inactivated | ZCWCC2    | Inactivated | FLJ20716  | Inactivated |
| FLJ12969      | Inactivated | AI650369  | Inactivated | LAMP2     | Inactivated |
| GPRASP2       | Inactivated | H66935    | Inactivated | stSG42843 | Inactivated |
| Hs.496518     | Inactivated | PRPS1     | Inactivated | C1GALT2   | Inactivated |
| Hs.53997      | Inactivated | DSIPI     | Inactivated | THOC2     | Inactivated |
| BEXL1         | Inactivated | MID2      | Inactivated | BIRC4     | Inactivated |
| MGC45400      | Inactivated | FLJ37392  | Inactivated | STAG2     | Inactivated |
| BEX2          | Inactivated | FLJ41813  | Inactivated | ODZ1      | Inactivated |
| MGC23947      | Inactivated | PSMD10    | Inactivated | SMARCA1   | Inactivated |
| NGFRAP1       | Inactivated | APG4A     | Inactivated | APLN      | Inactivated |
| TCEAL1        | Inactivated | KCNE1L    | Inactivated | XPNPEP2   | Inactivated |
| PLP1          | Inactivated | CHRDL1    | Inactivated | CXorf9    | Inactivated |
| RAB9B         | Inactivated | AMOT      | Inactivated | ZDHHC9    | Inactivated |
| MGC39900      | Inactivated | LRCH2     | Inactivated | FLJ11362  | Inactivated |
| Hs.110168     | Inactivated | KLHL13    | Inactivated | ELF4      | Inactivated |
| DKFZp686O1267 | Inactivated | DKFZp686L | Inactivated | Hs.271940 | Inactivated |
| FLJ36333      | Inactivated | Hs.186704 | Inactivated | Hs.424932 | Inactivated |
| LOC139231     | Inactivated | IL13RA1   | Inactivated | SLC25A14  | Inactivated |
| FLJ33516      | Inactivated | RNF127    | Inactivated | RBMX2     | Inactivated |
| FLJ10178      | Inactivated | Hs.175048 | Inactivated | MST4      | Inactivated |
| FLJ20298      | Inactivated | PGRMC1    | Inactivated | Hs.119889 | Inactivated |
| LOC92129      | Inactivated | UBE2A     | Inactivated | FLJ38120  | Inactivated |
| CLDN2         | Inactivated | Hs.496662 | Inactivated | Hs.291319 | Inactivated |
| ZCWCC2        | Inactivated | NRF       | Inactivated | MBNL3     | Inactivated |
| AI650369      | Inactivated | Hs.178536 | Inactivated | Hs.287979 | Inactivated |
| H66935        | Inactivated | RPL39     | Inactivated | Hs.148401 | Inactivated |
| PRPS1         | Inactivated | ZNF183    | Inactivated | Hs.268566 | Inactivated |



|                |             |           |             |           |             |
|----------------|-------------|-----------|-------------|-----------|-------------|
| DSIPI          | Inactivated | AKAP28    | Inactivated | MGC16121  | Inactivated |
| MID2           | Inactivated | NKAP      | Inactivated | W84737    | Inactivated |
| FLJ37392       | Inactivated | PEPP.2.   | Inactivated | SLC9A6    | Inactivated |
| FLJ41813       | Inactivated | ZBTB33    | Inactivated | Hs.205436 | Inactivated |
| PSMD10         | Inactivated | FLJ20716  | Inactivated | FLJ12649  | Inactivated |
| APG4A          | Inactivated | LAMP2     | Inactivated | ARHGEF6   | Inactivated |
| KCNE1L         | Inactivated | stSG42843 | Inactivated | FLJ38034  | Inactivated |
| CHRDL1         | Inactivated | C1GALT2   | Inactivated | RBMX      | Inactivated |
| AMOT           | Inactivated | THOC2     | Inactivated | ATP11C    | Inactivated |
| LRCH2          | Inactivated | BIRC4     | Inactivated | Hs.112784 | Inactivated |
| KLHL13         | Inactivated | STAG2     | Inactivated | Hs.127679 | Inactivated |
| DKFZp686L20145 | Inactivated | ODZ1      | Inactivated | Hs.31542  | Inactivated |
| Hs.186704      | Inactivated | SMARCA1   | Inactivated | LDOC1     | Inactivated |
| IL13RA1        | Inactivated | APLN      | Inactivated | Hs.6795   | Inactivated |
| RNF127         | Inactivated | XPNPEP2   | Inactivated | CXORF40.  | Inactivated |
| Hs.175048      | Inactivated | CXorf9    | Inactivated | U66043.   | Inactivated |
| PGRMC1         | Inactivated | ZDHHC9    | Inactivated | FAM11A.   | Inactivated |
| UBE2A          | Inactivated | FLJ11362  | Inactivated | U66046    | Inactivated |
| Hs.496662      | Inactivated | ELF4      | Inactivated | N48339    | Inactivated |
| NRF            | Inactivated | Hs.271940 | Inactivated | Hs.146087 | Inactivated |
| Hs.178536      | Inactivated | Hs.424932 | Inactivated | MTM1      | Inactivated |
| RPL39          | Inactivated | SLC25A14  | Inactivated | Hs.34079  | Inactivated |
| ZNF183         | Inactivated | RBMX2     | Inactivated | MTMR1     | Inactivated |
| AKAP28         | Inactivated | MST4      | Inactivated | M79236    | Inactivated |
| NKAP           | Inactivated | Hs.119889 | Inactivated | Hs.99402  | Inactivated |
| PEPP.2.        | Inactivated | FLJ38120  | Inactivated | Hs.124981 | Inactivated |
| ZBTB33         | Inactivated | Hs.291319 | Inactivated | HMGB3     | Inactivated |
| FLJ20716       | Inactivated | MBNL3     | Inactivated | LOC203547 | Inactivated |
| LAMP2          | Inactivated | Hs.287979 | Inactivated | GABRE     | Inactivated |
| stSG42843      | Inactivated | Hs.148401 | Inactivated | NSDHL     | Inactivated |
| C1GALT2        | Inactivated | Hs.268566 | Inactivated | PNMA5     | Inactivated |
| THOC2          | Inactivated | MGC16121  | Inactivated | PNMA6A    | Inactivated |
| BIRC4          | Inactivated | W84737    | Inactivated | RAB39B    | Inactivated |
| STAG2          | Inactivated | LOC159091 | Inactivated | F8A.      | Inactivated |
| ODZ1           | Inactivated | Hs.269127 | Inactivated | FLJ25895. | Inactivated |

|           |             |           |             |            |             |
|-----------|-------------|-----------|-------------|------------|-------------|
| SMARCA1   | Inactivated | FLJ23614  | Inactivated | Hs.522189. | Inactivated |
| APLN      | Inactivated | DDX26B    | Inactivated | Hs.458197  | Escape      |
| XPNPEP2   | Inactivated | SLC9A6    | Inactivated | MAOA       | Escape      |
| CXorf9    | Inactivated | Hs.205436 | Inactivated | FUNDC1     | Escape      |
| ZDHHC9    | Inactivated | FLJ12649  | Inactivated | Hs.232417  | Escape      |
| FLJ11362  | Inactivated | ARHGEF6   | Inactivated | AA130835   | Escape      |
| ELF4      | Inactivated | FLJ38034  | Inactivated | SH3BGRL    | Escape      |
| Hs.271940 | Inactivated | RBMX      | Inactivated |            |             |
| Hs.424932 | Inactivated | ATP11C    | Inactivated |            |             |
| SLC25A14  | Inactivated | Hs.112784 | Inactivated |            |             |
| RBMX2     | Inactivated | Hs.127679 | Inactivated |            |             |
| MST4      | Inactivated | Hs.31542  | Inactivated |            |             |
| Hs.119889 | Inactivated | LDOC1     | Inactivated |            |             |
| FLJ38120  | Inactivated | Hs.6795   | Inactivated |            |             |
| Hs.291319 | Inactivated | CXORF40.  | Inactivated |            |             |
| MBNL3     | Inactivated | U66043.   | Inactivated |            |             |
| Hs.287979 | Inactivated | FAM11A.   | Inactivated |            |             |
| Hs.148401 | Inactivated | U66046    | Inactivated |            |             |
| Hs.268566 | Inactivated | N48339    | Inactivated |            |             |
| MGC16121  | Inactivated | Hs.146087 | Inactivated |            |             |
| W84737    | Inactivated | MTM1      | Inactivated |            |             |
| LOC159091 | Inactivated | Hs.34079  | Inactivated |            |             |
| Hs.269127 | Inactivated | MTMR1     | Inactivated |            |             |
| T91371    | Inactivated | M79236    | Inactivated |            |             |
| BC008642  | Inactivated | Hs.99402  | Inactivated |            |             |
| FLJ23614  | Inactivated | Hs.124981 | Inactivated |            |             |
| DDX26B    | Inactivated | HMGB3     | Inactivated |            |             |
| SLC9A6    | Inactivated | LOC203547 | Inactivated |            |             |
| Hs.205436 | Inactivated | GABRE     | Inactivated |            |             |
| FLJ12649  | Inactivated | NSDHL     | Inactivated |            |             |
| ARHGEF6   | Inactivated | PNMA5     | Inactivated |            |             |
| FLJ38034  | Inactivated | PNMA6A    | Inactivated |            |             |
| RBMX      | Inactivated | ZNF275    | Inactivated |            |             |
| ATP11C    | Inactivated | TREX2     | Inactivated |            |             |
| Hs.112784 | Inactivated | ATP2B3    | Inactivated |            |             |

|           |             |            |             |
|-----------|-------------|------------|-------------|
| Hs.127679 | Inactivated | TKTL1      | Inactivated |
| Hs.31542  | Inactivated | FLNA       | Inactivated |
| LDOC1     | Inactivated | D60607     | Inactivated |
| Hs.6795   | Inactivated | F8         | Inactivated |
| CXORF40.  | Inactivated | HCBP6      | Inactivated |
| U66043.   | Inactivated | Hs.6917    | Inactivated |
| FAM11A.   | Inactivated | MTCP1      | Inactivated |
| U66046    | Inactivated | FLJ38567   | Inactivated |
| N48339    | Inactivated | H78350     | Inactivated |
| Hs.146087 | Inactivated | RAB39B     | Inactivated |
| MTM1      | Inactivated | F8A.       | Inactivated |
| Hs.34079  | Inactivated | FLJ25895.  | Inactivated |
| MTMR1     | Inactivated | Hs.522189. | Inactivated |
| M79236    | Inactivated | Hs.458197  | Escape      |
| Hs.99402  | Inactivated | Hs.282780  | Escape      |
| Hs.124981 | Inactivated | Hs.86849   | Escape      |
| HMGB3     | Inactivated | Hs.229338  | Escape      |
| LOC203547 | Inactivated | MAOA       | Escape      |
| GABRE     | Inactivated | FUNDC1     | Escape      |
| NSDHL     | Inactivated | Hs.232417  | Escape      |
| PNMA5     | Inactivated | AA130835   | Escape      |
| PNMA6A    | Inactivated | FLJ31610   | Escape      |
| ZNF275    | Inactivated | SH3BGRL    | Escape      |
| TREX2     | Inactivated |            |             |
| ATP2B3    | Inactivated |            |             |
| MGC29729  | Inactivated |            |             |
| BC030106  | Inactivated |            |             |
| DUSP9     | Inactivated |            |             |
| TKTL1     | Inactivated |            |             |
| FLNA      | Inactivated |            |             |
| D60607    | Inactivated |            |             |
| RPL10     | Inactivated |            |             |
| TAZ       | Inactivated |            |             |
| GDI       | Inactivated |            |             |
| DXS9928E  | Inactivated |            |             |

|            |             |
|------------|-------------|
| F8         | Inactivated |
| HCBP6      | Inactivated |
| Hs.6917    | Inactivated |
| MTCP1      | Inactivated |
| FLJ38567   | Inactivated |
| H78350     | Inactivated |
| RAB39B     | Inactivated |
| F8A.       | Inactivated |
| FLJ25895.  | Inactivated |
| Hs.522189. | Inactivated |
| Hs.458197  | Escape      |
| Hs.282780  | Escape      |
| Hs.86849   | Escape      |
| Hs.229338  | Escape      |
| DDX3X      | Escape      |
| MAOA       | Escape      |
| FUNDC1     | Escape      |
| Hs.232417  | Escape      |
| AA130835   | Escape      |
| KIAA0522   | Escape      |
| FLJ31610   | Escape      |
| T54860     | Escape      |
| BC014382   | Escape      |
| SH3BGRL    | Escape      |
