# Supplementary material for: Genomic Environment Predicts Expression Patterns on the Human Inactive X Chromosome
Source: PubMed Central journal article supplement (PMC1584270; doi:10.1371/journal.pgen.0020151), 2006-09-29
Supplement: pgen.0020151.st004.pdf [file pgen.0020151.st004.pdf]

Supplemental Table 4. Success rates of classification, when only (GATA)<sub>n</sub> was used.

|                                    | 50 kb | 100 kb | 250 kb |
|------------------------------------|-------|--------|--------|
| <i>Training set (largely Xp22)</i> |       |        |        |
| $\tau$                             | 0.95  | 0.93   | 0.26   |
| Success in <i>E</i>                | 21%   | 24%    | 62%    |
| Success in <i>I</i>                | 95%   | 86%    | 86%    |
| <i>Xp22 test set</i>               |       |        |        |
| $\tau$                             | 0.29  | 0.03   | 0.05   |
| Success in <i>E</i>                | 60%   | 81%    | 83%    |
| Success in <i>I</i>                | 86%   | 85%    | 100%   |
| <i>Other X test set</i>            |       |        |        |
| $\tau$                             | 0.07  | 0.17   | 0.15   |
| Success in <i>E</i>                | 29%   | 50%    | 83%    |
| Success in <i>I</i>                | 86%   | 65%    | 50%    |
| <i>Whole X training set</i>        |       |        |        |
| $\tau$                             | 0.26  | 0.89   | 0.11   |
| Success in <i>E</i>                | 33%   | 30%    | 70%    |
| Success in <i>I</i>                | 77%   | 86%    | 69%    |
